# Supplementary material
Source: Research Square preprint supplement (doi:10.21203/rs.3.rs-9530885/v1)
Supplement: Supplementary file 2 [file da9d38b807146a77fe9eef71.docx]

**APPENDICES.**

- **Questionnaire Use During Survey in the Study Areas.**

1. Have you ever seen a pangolin? a) Yes b) No

2. Where have you seen a pangolin and what was your reaction?

3. Have you ever killed an Indian pangolin? a) Yes b) No

4. How are Indian pangolins killed? a) By people b) By dogs c) By other predators (specify).

5. Why do people kill Indian pangolins? Any perspective 1……, 2………..., 3……………

6. Who participates in the killing of Indian pangolins? a) Farmers b) Trained hunters c) Nomads d) others (specify) any Myths a) ……, ………………. b) ……………..

7. What is the sale price of Indian pangolin scales?

8. Have you ever sold or purchased such material like scales? Or others …Y/…N

9. Do you have any idea regarding any person/team working/ doing such businesses?

10. What do you do if, you find such material like scales or Animal/ dead /Live?

11. Do you think the species is decline in the area? Rate, High / moderate /low

12. Are there other factors responsible for decline in the species’ population?

13. What is the opinion of the local community regarding the Indian pangolin before awareness education? a) Liked pangolins b) Disliked pangolins.

14. What is the awareness of the local community regarding the Indian pangolin after awareness education? a) Liked pangolins b) Disliked pangolins

15. Do you know about the conservation project for the species in the area.

16. Do you wish to conserve the Indian pangolin? a) Yes b) No

17. How do you control Agriculture pest in the field? Particularly, termites ……….

18. Do you have any suggestions for their Protection/ controlled of killing?

19. How to make effective involvement of the community in the conservation programme?

20. What do you suggest if some incentive is given to the community for conservation?
