# Supplementary material
Source: Research Square preprint supplement (doi:10.21203/rs.3.rs-9530885/v1)

**APPENDICES I. (CITIES)**


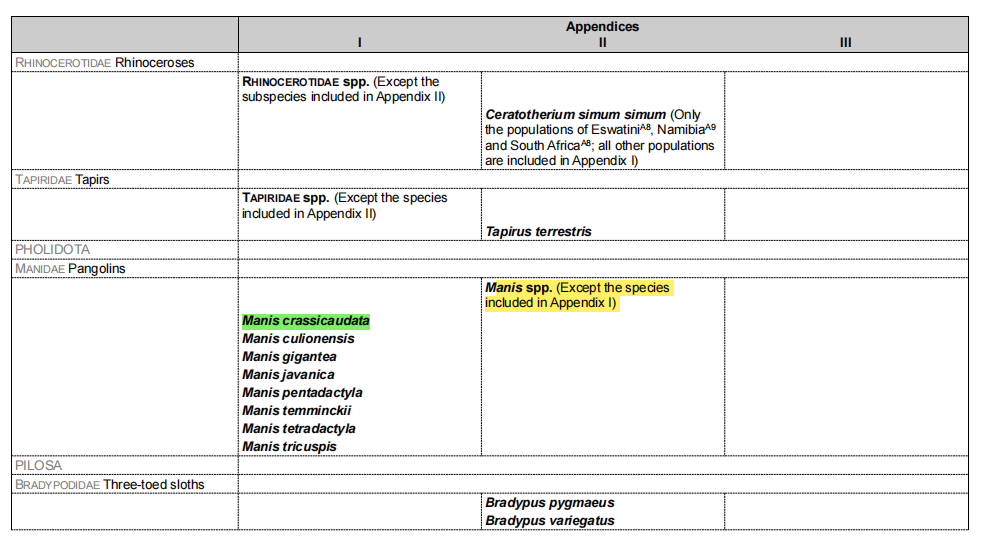

Supplement: Supplementary file 1 [file 26becc845bcb528b29903c82.docx]
